# Supplementary material
Source: PubMed Central journal article supplement (PMC3719623)
Supplement: JCM.00992-13_zjm999092706so5.pdf [file JCM.00992-13_zjm999092706so5.pdf]

**Table 5S Divergence between *C. pecorum* populations**

| <i>C. pecorum</i> population                             | $D_{xy}^*$ | Number of fixed differences/Number of shared mutations | $D_{nt}^{\Delta}$ |
|----------------------------------------------------------|------------|--------------------------------------------------------|-------------------|
| Six USA livestock vs. All 29 Australian isolates         | 0.00264    | 0 / 10                                                 | 8.006             |
| Six USA livestock vs. 12 Australian livestock isolates   | 0.00270    | 0 / 8                                                  | 8.361             |
| Six USA livestock vs. 17 Australian koala isolates       | 0.00256    | 0 / 4                                                  | 7.755             |
| All 18 livestock vs. 17 Australian koala isolates        | 0.00211    | 0 / 4                                                  | 6.415             |
| 12 Australian livestock vs. 17 Australian koala isolates | 0.00189    | 0 / 2                                                  | 5.745             |

$D_{xy}^*$ : Average number of nucleotide substitutions per site between populations (Jukes-Cantor corrected);  $D_{nt}^{\Delta}$ : Average number of nucleotide differences between populations.
